# Supplementary material
Source: Research Square preprint supplement (doi:10.21203/rs.3.rs-8936868/v1)
Supplement: Supplementary file 1 [file 844960f7befd5cfb0c10537e.pdf]

# Digital Finance

## Algorithmic Compliance and Regulatory Loss in Digital Assets

**Krishna Sharma**

Hoover Institution, Stanford University

Email: ksharma3@stanford.edu

ORCID: 0009-0002-8916-6500

**Khemraj Bhatt**

First Citizens Bank, Concord, NC, USA

Email: khemrajbhatt.24@gmail.com

ORCID: 0009-0003-7969-3187

**Corresponding Author:**

Krishna Sharma

Email: ksharma3@stanford.edu

Khemraj Bhatt

Email: khemrajbhatt.24@gmail.com

**Keywords:** Cryptocurrency; Anti-Money Laundering; Concept Drift; Regulatory Technology; Model Risk

**Author Contributions:** K.S. and K.B. contributed equally to the conceptualization, methodology, analysis, and writing of this manuscript. Both authors reviewed and approved the final version.

**Funding:** This research received no external funding.

**Conflict of Interest:** The authors declare no competing financial or non-financial interests.

**Data Availability:** The Elliptic Bitcoin transaction dataset is publicly available.

**Code Availability:** Replication code is available from the corresponding author upon reasonable request.
